# Supplementary material for: The association between interleukin-6 inhibitors as treatment for COVID-19 and mental health problems in ICU survivors
Source: Research Square preprint supplement (doi:10.21203/rs.3.rs-6571420/v1), 2025-05-09
Supplement: Supplementary file 1 [file 46fc013500567f3c80349105.pdf]

Supplementary material to:

**The association between interleukin-6 inhibitors as treatment for COVID-19 and mental health problems in ICU survivors**

**Table S1**

*Psychiatric medications considered to define pre-intensive care unit mental health problems in the university medical center Utrecht follow-up cohort*

| Class           | Drugs taken into account                                                                                                                                                                                                                                                                                                                                                                                                                                                                                                                     |
|-----------------|----------------------------------------------------------------------------------------------------------------------------------------------------------------------------------------------------------------------------------------------------------------------------------------------------------------------------------------------------------------------------------------------------------------------------------------------------------------------------------------------------------------------------------------------|
| Antidepressants | Imipramine, clomipramine, amitriptyline, nortriptyline, nortrilen, doxepine, sinequan, dosulepine, prothiaden, maprotiline, fluoxetine, Prozac, citalopram, cipramil, paroxetine, Seroxat, sertraline, Zoloft, fluvoxamine, fevarin, escitalopram, Lexapro, fenelzine, nardil, tranylcypromine, tracydal, moclobemide, aurorix, mianserine, tolvon, trazodone, trazolan, mirtazapine, Remeron, bupropion, Wellbutrin, venlafaxine, efexor, duloxetine, Cymbalta, agomelatine, valdoxan, vortioxetine, brintellix, mirtazepine                |
| Antipsychotics  | Flufenazine, perfenazine, periciazine, neuleptil, haloperidol, Haldol, broomperidol, impromen, droperidol, sertindol, serdolect, lurasidone, latuda, flupentixol, fluaxol, clopentixol, chloorprotixeen, Truxal, zuclopentixol, cisordinol, fluspirileen, imap, pimozide, penfluridol, acemap, clozapine, zaponex, leponex, olanzapine, Zyprexa, quetiapine, Seroquel, sulpiride, dogmatil, tiapride, amisulpride, aktiprol, risperidone, Risperdal, aripiprazole, abilify, paliperidone, Invega, cariprazine, reagila, brexpiprazol, rxulti |
| Anxiolytics     | Diazepam, chlordiazepoxide, oxazepam, seresta, lorazepam, bromazepam, clobazam, frisium, prazepam, reepam, alprazolam, xanax                                                                                                                                                                                                                                                                                                                                                                                                                 |

**Table S2***Patient characteristics divided by availability of outcome measurements*

|                                                              | <b>Overall<br/>n = 206</b> | <b>Study Population<br/>n = 170</b> | <b>Excluded (Any<br/>missing<br/>outcome)<br/>n = 36</b> |
|--------------------------------------------------------------|----------------------------|-------------------------------------|----------------------------------------------------------|
| Exposed to interleukin-6 inhibitor <sup>†</sup> , n (%)      | 145 (70.4)                 | 119 (70.0)                          | 26 (72.2)                                                |
| Age in years, mean (SD)                                      | 59.7 (10.2)                | 60.1 (9.6)                          | 57.9 (12.6)                                              |
| Female, n (%)                                                | 71 (34.5)                  | 62 (36.5)                           | 9 (25.0)                                                 |
| BMI, median (IQR) <sup>a</sup>                               | 28.7 (25.4 – 31.7)         | 29.0 (25.8 – 32.0)                  | 27.3 (24.1 – 29.8)                                       |
| Pre-ICU mental health problems, n (%) <sup>b</sup>           | 34 (16.5)                  | 32 (18.8)                           | 2 (5.6)                                                  |
| Pre-ICU use of psychiatric medication, n (%) <sup>c</sup>    | 38 (18.4)                  | 33 (19.4)                           | 5 (13.9)                                                 |
| Antidepressants, n (%)                                       | 19 (9.2)                   | 18 (10.6)                           | 1 (2.8)                                                  |
| Antipsychotics, n (%)                                        | 15 (7.3)                   | 12 (7.1)                            | 3 (8.3)                                                  |
| Anxiolytics, n (%)                                           | 14 (6.8)                   | 12 (7.1)                            | 2 (5.6)                                                  |
| ICU length of stay in days, median (IQR)                     | 10 (6 – 18)                | 10 (7 – 18)                         | 9 (5 – 16)                                               |
| APACHE IV score, mean (SD)                                   | 64.5 (18.5)                | 65.0 (19.2)                         | 62.1 (14.9)                                              |
| SOFA on day 1, median (IQR)                                  | 5 (3 – 7)                  | 5 (3 – 7)                           | 5 (3 – 6)                                                |
| Delta SOFA between day 1 and day 4 (or final day), mean (SD) | 0.5 (3.2)                  | 0.6 (3.4)                           | -0.1 (2.2)                                               |
| Mechanical ventilation, n (%)                                | 181 (87.9)                 | 151 (88.8)                          | 30 (83.3)                                                |
| Propofol sedation, n (%)                                     | 165 (80.1)                 | 137 (80.6)                          | 28 (77.8)                                                |
| Midazolam sedation, n (%)                                    | 144 (69.9)                 | 121 (71.2)                          | 23 (63.9)                                                |
| Delirium during ICU admission, n (%) <sup>d</sup>            | 155 (75.2)                 | 127 (74.7)                          | 28 (77.8)                                                |
| Glucocorticoids during ICU admission, n (%)                  | 200 (97.1)                 | 164 (96.5)                          | 36 (100)                                                 |

APACHE = Acute Physiology and Chronic Health Evaluation, BMI = body mass index, ICU = Intensive Care Unit, IL-6 = Interleukin-6, IQR = interquartile range, SD = standard deviation, SOFA = Sequential Organ Failure Assessment

<sup>†</sup>Tocilizumab or sarilumab

<sup>a</sup> Missing for 4 (2%) patients

<sup>b</sup> Missing for 1 (0%) patient

<sup>c</sup> Missing for 4 (2%) patients

<sup>d</sup> Missing for 12 (6%) patients

**Table S3**

*Sensitivity analysis on mental health problems at 3 months and exposure to interleukin-6 inhibitors (Radboudumc cohort only)*

|                   |                                                                                  |               |                    |                                   |
|-------------------|----------------------------------------------------------------------------------|---------------|--------------------|-----------------------------------|
|                   | Composite outcome of mental health problems<br>(PTSD, anxiety and/or depression) |               |                    |                                   |
|                   | Events/ total<br>(n)                                                             | Absolute risk | Crude OR (95% CI)  | Adjusted <sup>a</sup> OR (95% CI) |
| IL-6 inhibitor    | 11 / 34                                                                          | 32%           | 1.04 (0.31 – 3.46) | 1.02 (0.30 – 3.41)                |
| No IL-6 Inhibitor | 6 / 19                                                                           | 32%           |                    |                                   |
|                   | Post-traumatic stress disorder                                                   |               |                    |                                   |
|                   | Events / total<br>(n)                                                            | Absolute risk | Crude OR (95% CI)  | Adjusted <sup>a</sup> OR (95% CI) |
| IL-6 inhibitor    | 5 / 34                                                                           | 15%           | 1.47 (0.26 – 8.40) | 1.36 (0.23 – 7.88)                |
| No IL-6 Inhibitor | 2 / 19                                                                           | 11%           |                    |                                   |
|                   | Anxiety                                                                          |               |                    |                                   |
|                   | Events / total<br>(n)                                                            | Absolute risk | Crude OR (95% CI)  | Adjusted <sup>a</sup> OR (95% CI) |
| IL-6 inhibitor    | 7 / 34                                                                           | 21%           | 0.97 (0.24 – 3.87) | 0.87 (0.21 – 3.59)                |
| No IL-6 Inhibitor | 4 / 19                                                                           | 21%           |                    |                                   |
|                   | Depression                                                                       |               |                    |                                   |
|                   | Events / total<br>(n)                                                            | Absolute risk | Crude OR (95% CI)  | Adjusted <sup>a</sup> OR (95% CI) |
| IL-6 inhibitor    | 9 / 34                                                                           | 26%           | 1.01 (0.28 – 3.60) | 1.00 (0.28 – 3.58)                |
| No IL-6 Inhibitor | 5 / 19                                                                           | 26%           |                    |                                   |

CI = confidence interval, IL-6 = interleukin-6, OR = odds ratio, PTSD = post-traumatic stress disorder

<sup>a</sup> Adjusted for propensity scores estimated based on age, sex, body mass index, pre-intensive care unit (ICU) mental health problems, mechanical ventilation, Acute Physiology and Chronic Health Evaluation IV score, Sequential Organ Failure Assessment (SOFA) score on day 1, delta SOFA score between day 1 and day 4 (or the final ICU day if earlier), delirium during ICU admission and glucocorticoid use during ICU admission.

Table S4

*Sensitivity analysis on mental health problems and exposure to interleukin-6 inhibitors stratified by treatment center (university medical center Utrecht and Radboudumc)*

|                      | University medicalcenter Utrecht                                                 |                  |                    |                                   | Radboudumc            |                  |                    |                                   |
|----------------------|----------------------------------------------------------------------------------|------------------|--------------------|-----------------------------------|-----------------------|------------------|--------------------|-----------------------------------|
|                      | Composite outcome of mental health problems<br>(PTSD, anxiety and/or depression) |                  |                    |                                   |                       |                  |                    |                                   |
|                      | Events /<br>total (n)                                                            | Absolute<br>risk | Crude OR (95% CI)  | Adjusted <sup>a</sup> OR (95% CI) | Events /<br>total (n) | Absolute<br>risk | Crude OR (95% CI)  | Adjusted <sup>a</sup> OR (95% CI) |
| IL-6<br>inhibitor    | 25 / 82                                                                          | 30%              | 0.50 (0.21 – 1.15) | 0.45 (0.19 – 1.10)                | 10 / 37               | 27%              | 0.63 (0.19 – 2.07) | 0.53 (0.15 – 1.85)                |
| No IL-6<br>Inhibitor | 15 / 32                                                                          | 47%              |                    |                                   | 7 / 19                | 37%              |                    |                                   |
|                      | Post-traumatic stress disorder                                                   |                  |                    |                                   |                       |                  |                    |                                   |
|                      | Events /<br>total (n)                                                            | Absolute<br>risk | Crude OR (95% CI)  | Adjusted <sup>a</sup> OR (95% CI) | Events /<br>total (n) | Absolute<br>risk | Crude OR (95% CI)  | Adjusted <sup>a</sup> OR (95% CI) |
| IL-6<br>inhibitor    | 15 / 82                                                                          | 18%              | 0.43 (0.17 – 1.07) | 0.45 (0.17 – 1.18)                | 6 / 37                | 16%              | 0.54 (0.14 – 2.08) | 0.41 (0.10 – 1.76)                |
| No IL-6<br>Inhibitor | 11 / 32                                                                          | 34%              |                    |                                   | 5 / 19                | 26%              |                    |                                   |
|                      | Anxiety                                                                          |                  |                    |                                   |                       |                  |                    |                                   |
|                      | Events /<br>total (n)                                                            | Absolute<br>risk | Crude OR (95% CI)  | Adjusted <sup>a</sup> OR (95% CI) | Events /<br>total (n) | Absolute<br>risk | Crude OR (95% CI)  | Adjusted <sup>a</sup> OR (95% CI) |
| IL-6<br>inhibitor    | 20 / 82                                                                          | 24%              | 1.15 (0.43 – 3.06) | 1.11 (0.40 – 3.08)                | 6 / 37                | 16%              | 0.54 (0.14 – 2.08) | 0.33 (0.07 – 1.50)                |
| No IL-6<br>Inhibitor | 7 / 32                                                                           | 22%              |                    |                                   | 5 / 19                | 26%              |                    |                                   |
|                      | Depression                                                                       |                  |                    |                                   |                       |                  |                    |                                   |
|                      | Events /<br>total (n)                                                            | Absolute<br>risk | Crude OR (95% CI)  | Adjusted <sup>a</sup> OR (95% CI) | Events /<br>total (n) | Absolute<br>risk | Crude OR (95% CI)  | Adjusted <sup>a</sup> OR (95% CI) |
| IL-6<br>inhibitor    | 20 / 82                                                                          | 24%              | 0.71 (0.29 – 1.75) | 0.74 (0.29 – 1.90)                | 9 / 37                | 24%              | 0.90 (0.25 – 3.20) | 0.70 (0.18 – 2.70)                |
| No IL-6<br>Inhibitor | 10 / 32                                                                          | 31%              |                    |                                   | 5 / 19                | 26%              |                    |                                   |

CI = confidence interval, IL-6 = interleukin-6, OR = odds ratio, PTSD = post-traumatic stress disorder,

<sup>a</sup> Adjusted for propensity scores estimated based on age, sex, body mass index, pre-intensive care unit (ICU) mental health problems, mechanical ventilation, Acute Physiology and Chronic Health Evaluation IV score, Sequential Organ Failure Assessment (SOFA) score on day 1, delta SOFA score between day 1 and day 4 (or the final ICU day if earlier), delirium during ICU admission and glucocorticoid use during ICU admission.

Table S5

Sensitivity analysis on mental health problems and exposure to interleukin-6 inhibitors stratified by baseline CRP (&lt;75 mg/L vs. ≥75 mg/L)

|                      | Baseline CRP < 75 mg/L                                                           |                  |                    |                                   | Baseline CRP ≥ 75 mg/L |                  |                    |                                   |
|----------------------|----------------------------------------------------------------------------------|------------------|--------------------|-----------------------------------|------------------------|------------------|--------------------|-----------------------------------|
|                      | Composite outcome of mental health problems<br>(PTSD, anxiety and/or depression) |                  |                    |                                   |                        |                  |                    |                                   |
|                      | Events /<br>total (n)                                                            | Absolute<br>risk | Crude OR (95% CI)  | Adjusted <sup>a</sup> OR (95% CI) | Events /<br>total (n)  | Absolute<br>risk | Crude OR (95% CI)  | Adjusted <sup>a</sup> OR (95% CI) |
| IL-6<br>inhibitor    | 5 / 18                                                                           | 28%              | 0.34 (0.08 – 1.43) | 0.26 (0.04 – 1.92)                | 11 / 50                | 22%              | 0.52 (0.17 – 1.63) | 0.41 (0.12 – 1.41)                |
| No IL-6<br>Inhibitor | 8 / 15                                                                           | 53%              |                    |                                   | 7 / 20                 | 35%              |                    |                                   |
|                      | Post-traumatic stress disorder                                                   |                  |                    |                                   |                        |                  |                    |                                   |
|                      | Events /<br>total (n)                                                            | Absolute<br>risk | Crude OR (95% CI)  | Adjusted <sup>a</sup> OR (95% CI) | Events /<br>total (n)  | Absolute<br>risk | Crude OR (95% CI)  | Adjusted <sup>a</sup> OR (95% CI) |
| IL-6<br>inhibitor    | 2 / 18                                                                           | 11%              | 0.11 (0.02 – 0.65) | 0.09 (0.01 – 0.97)                | 7 / 50                 | 14%              | 0.92 (0.21 – 3.99) | 0.88 (0.18 – 4.22)                |
| No IL-6<br>Inhibitor | 8 / 15                                                                           | 53%              |                    |                                   | 3 / 20                 | 15%              |                    |                                   |
|                      | Anxiety                                                                          |                  |                    |                                   |                        |                  |                    |                                   |
|                      | Events /<br>total (n)                                                            | Absolute<br>risk | Crude OR (95% CI)  | Adjusted <sup>a</sup> OR (95% CI) | Events /<br>total (n)  | Absolute<br>risk | Crude OR (95% CI)  | Adjusted <sup>a</sup> OR (95% CI) |
| IL-6<br>inhibitor    | 4 / 18                                                                           | 22%              | 0.57 (0.12 – 2.68) | 0.40 (0.05 – 3.30)                | 8 / 50                 | 16%              | 0.57 (0.16 – 2.02) | 0.58 (0.15 – 2.27)                |
| No IL-6<br>Inhibitor | 5 / 15                                                                           | 33%              |                    |                                   | 5 / 20                 | 25%              |                    |                                   |
|                      | Depression                                                                       |                  |                    |                                   |                        |                  |                    |                                   |
|                      | Events /<br>total (n)                                                            | Absolute<br>risk | Crude OR (95% CI)  | Adjusted <sup>a</sup> OR (95% CI) | Events /<br>total (n)  | Absolute<br>risk | Crude OR (95% CI)  | Adjusted <sup>a</sup> OR (95% CI) |
| IL-6<br>inhibitor    | 5 / 18                                                                           | 28%              | 1.06 (0.23 – 4.94) | 0.49 (0.06 – 4.17)                | 9 / 50                 | 18%              | 0.41 (0.13 – 1.31) | 0.36 (0.10 – 1.28)                |
| No IL-6<br>Inhibitor | 4 / 15                                                                           | 27%              |                    |                                   | 7 / 20                 | 35%              |                    |                                   |

CI = confidence interval, CRP = C-reactive protein, IL-6 = interleukin-6, mg = milligram, OR = odds ratio, PTSD = post-traumatic stress disorder

<sup>a</sup> Adjusted for propensity scores estimated based on age, sex, body mass index, pre-intensive care unit (ICU) mental health problems, mechanical ventilation, Acute Physiology and Chronic Health Evaluation IV score, Sequential Organ Failure Assessment (SOFA) score on day 1, delta SOFA score between day 1 and day 4 (or the final ICU day if earlier), delirium during ICU admission and glucocorticoid use during ICU admission.
